# Supplementary material for: Association between Perinatal Outcomes and Maternal Risk Factors: Age, Body Mass Index and Cigarette Smoking
Source: Preprints.org preprint supplement (doi:10.20944/preprints202405.1245.v1), 2024-05-20
Supplement: Supplementary file 2 [file supplementary]

BMI: body mass index, CS: cesarean section, BW: birth weight, GDM: gestational diabetes mellitus, PE: preeclampsia, IVF: in vitro fertilization.

Table A1. Results from multiple logistic regression analysis for maternal age >40 years.

Table A2: Results from multiple logistic regression analysis for body mass index <18.

BMI: body mass index, CS: cesarean section, BW: birth weight, GDM: gestational diabetes mellitus, PE: preeclampsia, IVF: in vitro fertilization.

Table A3: Results from multiple logistic regression analysis for body mass index ≥35.

BMI: body mass index, CS: cesarean section, BW: birth weight, GDM: gestational diabetes mellitus, PE: preeclampsia, IVF: in vitro fertilization.

Table A4: Results from multiple logistic regression analysis for smoking status.

BMI: body mass index, CS: cesarean section, BW: birth weight, GDM: gestational diabetes mellitus, PE: preeclampsia, IVF: in vitro fertilization.
